# Supplementary material for: Directing Experimental Biology: A Case Study in Mitochondrial Biogenesis
Source: PLoS Comput Biol. 2009 Mar 20;5(3):e1000322. doi: 10.1371/journal.pcbi.1000322 (PMC2654405; doi:10.1371/journal.pcbi.1000322)
Supplement: Table S1 — Summary of computational predictions and results of petite frequency assay. (0.12 MB XLS) [file pcbi.1000322.s003.xls]

## Sheet: RawData
	Systematic Name	Common Name	SPELL Top 40	PIXIE Top 40	MEFIT Top 40	Any Method Top 40	Mitochondrion Localized	Actin Localized	No Known Function on 4/15/07	Annotated to GO:0007005 on 4/15/2007	"Under-Annotation"	Included in Retraining Set	Positive Control, Novel Prediction, or Random	1st or 2nd Iteration Tested	Petite Assay Phenotype	Mean Petite Frequency with Respect to Wild-type	p-value (compared to distrubution of wild-type)
Data from our companion manuscript, Hess et al., "Computationally driven, quantitative experiments discover genes required for mitochondrial biogenesis"	YAL010C	MDM10	no	no	no	no	yes	no	no	yes	no	yes	control	1st	respiratory deficient	0	N/A
	YBR037C	SCO1	no	no	no	no	yes	no	no	no	yes	yes	control	1st	respiratory deficient	0	N/A
	YDR148C	KGD2	no	no	no	no	yes	no	no	no	yes	yes	control	1st	respiratory deficient	0	N/A
	YDR375C	BCS1	no	no	yes	yes	yes	no	no	no	yes	yes	control	1st	respiratory deficient	0	N/A
	YEL050C	RML2	yes	no	yes	yes	yes	no	no	no	yes	yes	control	1st	respiratory deficient	0	N/A
	YER017C	AFG3	no	no	no	no	yes	no	no	no	yes	yes	control	1st	respiratory deficient	0	N/A
	YGR062C	COX18	no	no	no	no	yes	no	no	no	yes	yes	control	1st	respiratory deficient	0	N/A
	YHR038W	RRF1	no	no	no	no	yes	no	no	no	yes	yes	control	1st	respiratory deficient	0	N/A
	YHR116W	COX23	no	no	no	no	yes	no	no	no	yes	yes	control	1st	respiratory deficient	0	N/A
	YJL180C	ATP12	yes	no	no	yes	yes	no	no	no	yes	yes	control	1st	respiratory deficient	0	N/A
	YKL087C	CYT2	yes	no	yes	yes	yes	no	no	no	yes	yes	control	1st	respiratory deficient	0	N/A
	YKL148C	SDH1	no	no	no	no	yes	no	no	no	yes	yes	control	1st	respiratory deficient	0	N/A
	YLL027W	ISA1	no	no	no	no	yes	no	no	no	yes	yes	control	1st	respiratory deficient	0	N/A
	YLR203C	MSS51	yes	no	no	yes	yes	no	no	no	yes	yes	control	1st	respiratory deficient	0	N/A
	YLR239C	LIP2	yes	no	yes	yes	yes	no	no	no	yes	yes	control	1st	respiratory deficient	0	N/A
	YML061C	PIF1	no	no	no	no	yes	no	no	yes	no	yes	control	1st	respiratory deficient	0	N/A
	YML120C	NDI1	no	no	no	no	yes	no	no	no	yes	yes	control	1st	respiratory deficient	0	N/A
	YMR089C	YTA12	yes	no	no	yes	yes	no	no	no	yes	yes	control	1st	respiratory deficient	0	N/A
	YMR267W	PPA2	yes	no	yes	yes	yes	no	no	no	yes	yes	control	1st	respiratory deficient	0	N/A
	YNL252C	MRPL17	yes	no	yes	yes	yes	no	no	no	yes	yes	control	1st	respiratory deficient	0	N/A
	YNL315C	ATP11	yes	no	yes	yes	yes	no	no	no	yes	yes	control	1st	respiratory deficient	0	N/A
	YNR017W	MAS6	no	yes	no	yes	yes	no	no	no	yes	yes	control	1st	respiratory deficient	0	N/A
	YOR187W	TUF1	yes	no	yes	yes	yes	no	no	no	yes	yes	control	1st	respiratory deficient	0	N/A
	YPL118W	MRP51	yes	no	yes	yes	yes	no	no	no	yes	yes	control	1st	respiratory deficient	0	N/A
	YPL172C	COX10	yes	no	no	yes	yes	no	no	no	yes	yes	control	1st	respiratory deficient	0	N/A
	YPL215W	CBP3	no	no	yes	yes	yes	no	no	no	yes	yes	control	1st	respiratory deficient	0	N/A
	YPL262W	FUM1	no	no	no	no	yes	no	no	no	yes	yes	control	1st	respiratory deficient	0	N/A
	YPR133W-A	TOM5	no	no	no	no	yes	no	no	no	yes	yes	control	1st	respiratory deficient	0	N/A
	YDR194C	MSS116	no	no	yes	yes	yes	no	no	no	yes	yes	control	1st	altered	32.1	4.6e-05
	YPR125W	YLH47	no	no	no	no	yes	no	no	yes	no	yes	control	1st	altered	34	0.00025
	YGR231C	PHB2	yes	yes	no	yes	yes	no	no	no	yes	yes	control	1st	altered	37.4	4e-05
	YKR065C	PAM17	no	no	no	no	yes	no	no	no	yes	yes	control	1st	altered	41.2	4e-05
	YGR132C	PHB1	yes	yes	yes	yes	yes	no	no	no	yes	yes	control	1st	altered	47.5	3.1e-05
	YKL194C	MST1	yes	no	yes	yes	yes	no	no	no	yes	yes	control	1st	altered	60.4	0.0013
	YIL098C	FMC1	no	no	no	no	yes	no	no	no	yes	yes	control	1st	altered	64.3	0.0021
	YOR045W	TOM6	no	no	no	no	yes	no	no	no	yes	yes	control	1st	altered	67.9	0.00071
	YDR430C	CYM1	no	no	no	no	yes	no	no	no	yes	yes	control	1st	altered	77.5	0.0278
	YDR470C	UGO1	no	no	no	no	yes	no	no	yes	no	yes	control	1st	no phenotype	85.8	0.0769
	YBL022C	PIM1	no	no	no	no	yes	no	no	no	yes	yes	control	1st	no phenotype	92.2	0.0928
	YDL107W	MSS2	no	no	no	no	yes	no	no	no	yes	yes	control	1st	no phenotype	103.1	1
	YJL112W	MDV1	no	no	no	no	yes	no	no	yes	no	yes	control	1st	no phenotype	104	0.799
	YOR142W	LSC1	no	no	no	no	yes	no	no	no	yes	yes	control	1st	altered	134.9	0.002
	YNR001C	CIT1	no	no	no	no	yes	no	no	no	yes	yes	control	1st	altered	135.9	4e-05
	YKL167C	MRP49	yes	no	no	yes	yes	no	no	no	yes	yes	control	1st	altered	151.6	0.00011
	YMR228W	MTF1	no	no	no	no	yes	no	no	no	yes	yes	control	1st	altered	162.9	0.01
	YPL132W	COX11	no	no	yes	yes	yes	no	no	no	yes	yes	control	1st	altered	167.8	0.0031
	YML129C	COX14	no	no	no	no	yes	no	no	no	yes	yes	control	1st	altered	252.6	0.002
	YNL079C	TPM1	no	no	no	no	no	yes	no	yes	no	yes	control	1st	altered	253.7	0.00025
	YBL067C	UBP13	no	no	no	no	no	no	yes	no	no	yes	novel	1st	respiratory deficient	0	N/A
	YBR003W	COQ1	no	no	no	no	yes	no	no	no	no	yes	novel	1st	respiratory deficient	0	N/A
	YBR171W	SEC66	no	no	no	no	no	no	no	no	no	yes	novel	1st	respiratory deficient	0	N/A
	YGR150C	DMR1	no	no	no	no	yes	no	yes	no	no	yes	novel	1st	respiratory deficient	0	N/A
	YIL095W	PRK1	no	yes	no	yes	no	yes	no	no	no	yes	novel	1st	respiratory deficient	0	N/A
	YKL207W	AIM27	no	no	no	no	no	no	yes	no	no	yes	novel	1st	respiratory deficient	0	N/A
	YLR204W	QRI5	no	no	no	no	yes	no	no	no	no	yes	novel	1st	respiratory deficient	0	N/A
	YLR337C	VRP1	no	yes	no	yes	no	yes	no	no	no	yes	novel	1st	respiratory deficient	0	N/A
	YMR098C	AIM35	yes	yes	yes	yes	yes	no	yes	no	no	yes	novel	1st	respiratory deficient	0	N/A
	YMR282C	AEP2	no	no	yes	yes	yes	no	no	no	no	yes	novel	1st	respiratory deficient	0	N/A
	YNL138W	SRV2	no	yes	no	yes	no	yes	no	no	no	yes	novel	1st	respiratory deficient	0	N/A
	YPL050C	MNN9	no	no	no	no	no	no	no	no	no	yes	novel	1st	respiratory deficient	0	N/A
	YPL059W	GRX5	no	no	no	no	yes	no	no	no	no	yes	novel	1st	respiratory deficient	0	N/A
	YPL072W	UBP16	no	no	yes	yes	yes	no	no	no	no	yes	novel	1st	respiratory deficient	0	N/A
	YGL107C	RMD9	yes	no	yes	yes	yes	no	yes	no	no	no	novel	1st	respiratory deficient	0	N/A
	YER087W	AIM10	no	no	no	no	yes	no	yes	no	no	yes	novel	1st	altered	9.8	4.5e-05
	YJL046W	AIM22	yes	no	yes	yes	no	no	yes	no	no	yes	novel	1st	altered	13.5	8.2e-05
	YML112W	CTK3	no	no	no	no	no	no	no	no	no	yes	novel	1st	altered	25.7	0.00011
	YML030W	AIM31	yes	no	no	yes	yes	no	yes	no	no	yes	novel	1st	altered	30.2	0.0004
	YBR108W	AIM3	no	no	no	no	no	no	yes	no	no	yes	novel	1st	altered	30.3	0.00017
	YDR129C	SAC6	no	yes	no	yes	no	yes	no	no	no	yes	novel	1st	altered	34	4.6e-05
	YBR194W	AIM4	no	no	no	no	no	no	yes	no	no	yes	novel	1st	altered	39.1	0.0001
	YFR011C	AIM13	no	no	yes	yes	yes	no	yes	no	no	yes	novel	1st	altered	41.4	0.00064
	YJR032W	CPR7	no	no	no	no	no	no	no	no	no	yes	novel	1st	altered	43.2	0.00032
	YJR122W	CAF17	yes	yes	yes	yes	yes	no	yes	no	no	yes	novel	1st	altered	46	0.00077
	YOL053W	AIM39	no	no	no	no	no	no	yes	no	no	yes	novel	1st	altered	47.2	0.00017
	YHR059W	FYV4	no	no	yes	yes	yes	no	no	no	no	yes	novel	1st	altered	48.5	0.00045
	YNL100W	AIM37	yes	no	no	yes	yes	no	yes	no	no	yes	novel	1st	altered	49.2	0.004
	YKR016W	AIM28	yes	yes	no	yes	yes	no	yes	no	no	yes	novel	1st	altered	49.6	5.3e-06
	YNR018W	AIM38	no	no	no	no	yes	no	yes	no	no	yes	novel	1st	altered	56	0.00017
	YOR215C	AIM41	no	no	no	no	yes	no	yes	no	no	yes	novel	1st	altered	58.5	0.0109
	YBR262C	AIM5	no	no	yes	yes	yes	no	yes	no	no	yes	novel	1st	altered	59.4025	0.0186
	YML032C	RAD52	no	no	no	no	no	no	no	no	no	yes	novel	1st	altered	59.6	0.0031
	YGL220W	AIM15	no	no	yes	yes	no	no	yes	no	no	yes	novel	1st	altered	60	0.001
	YMR003W	AIM34	no	yes	no	yes	yes	no	yes	no	no	yes	novel	1st	altered	61.0069	0.035
	YBR022W	POA1	no	no	no	no	no	no	no	no	no	yes	novel	1st	altered	61.9	0.0017
	YER080W	AIM9	no	no	no	no	yes	no	yes	no	no	yes	novel	1st	altered	64.4	0.0097
	YLR289W	GUF1	no	no	no	no	yes	no	yes	no	no	yes	novel	1st	altered	67.5	0.0076
	YBL007C	SLA1	no	no	no	no	no	yes	no	no	no	yes	novel	1st	altered	80	0.0106
	YGR235C	YGR235C	no	yes	no	yes	yes	no	yes	no	no	no	novel	1st	no phenotype	87.3	0.2528
	YLR429W	CRN1	no	yes	no	yes	no	yes	no	no	no	no	novel	1st	no phenotype	87.3	0.1325
	YNR040W	YNR040W	no	yes	no	yes	yes	no	yes	no	no	no	novel	1st	no phenotype	87.3	0.0829
	YEL003W	GIM4	no	no	no	no	no	no	no	no	no	no	novel	1st	no phenotype	88.3	0.2421
	YLR253W	YLR253W	yes	yes	yes	yes	yes	no	yes	no	no	no	novel	1st	no phenotype	88.4708	0.6573
	YDL027C	YDL027C	no	no	no	no	yes	no	yes	no	no	no	novel	1st	no phenotype	89	0.1459
	YCR088W	ABP1	no	yes	no	yes	no	no	no	no	no	no	novel	1st	no phenotype	90.3	0.0969
	YOL062C	APM4	yes	no	no	yes	no	no	no	no	no	no	novel	1st	no phenotype	90.3	0.4248
	YNL051W	COG5	no	no	no	no	no	no	no	no	no	no	novel	1st	no phenotype	90.7	0.4714
	YDL161W	ENT1	no	no	no	no	no	yes	no	no	no	no	novel	1st	no phenotype	91.5	0.0831
	YOR216C	RUD3	no	no	no	no	no	no	no	no	no	no	novel	1st	no phenotype	92.1	0.5709
	YLR050C	YLR050C	no	no	no	no	no	no	yes	no	no	no	novel	1st	no phenotype	92.1332	0.1922
	YGR021W	YGR021W	no	no	yes	yes	yes	no	yes	no	no	no	novel	1st	no phenotype	92.6	0.3975
	YIL041W	GVP36	no	yes	no	yes	no	no	yes	no	no	no	novel	1st	no phenotype	94	0.1453
	YGR207C	YGR207C	no	no	no	no	yes	no	yes	no	no	no	novel	1st	no phenotype	94.3	0.9313
	YNL122C	YNL122C	yes	yes	yes	yes	yes	no	yes	no	no	no	novel	1st	no phenotype	95.5	0.6759
	YGR243W	YGR243W	no	yes	no	yes	yes	no	yes	no	no	no	novel	1st	no phenotype	95.6	0.5231
	YBL059W	YBL059W	no	no	no	no	yes	no	yes	no	no	no	novel	1st	no phenotype	96.6	0.8963
	YDR286C	YDR286C	no	no	yes	yes	no	no	yes	no	no	no	novel	1st	no phenotype	96.6	0.5544
	YIR024C	YIR024C	no	no	no	no	yes	no	yes	no	no	no	novel	1st	no phenotype	96.6	0.7105
	YKL007W	CAP1	no	yes	no	yes	no	yes	no	no	no	no	novel	1st	no phenotype	98.1	0.8116
	YJR075W	HOC1	no	no	no	no	no	no	no	no	no	no	novel	1st	no phenotype	98.4	0.5148
	YBL107C	YBL107C	no	no	yes	yes	no	no	yes	no	no	no	novel	1st	no phenotype	99.4	0.6653
	YOR356W	YOR356W	no	no	no	no	yes	no	no	no	no	no	novel	1st	no phenotype	99.6	0.4553
	YER152C	YER152C	no	yes	no	yes	no	no	yes	no	no	no	novel	1st	no phenotype	100.3	0.631
	YBR125C	PTC4	no	no	no	no	no	no	yes	no	no	no	novel	1st	no phenotype	100.5	0.8471
	YBR096W	YBR096W	no	no	no	no	no	no	yes	no	no	no	novel	1st	no phenotype	101	0.8532
	YOR367W	SCP1	no	yes	no	yes	no	yes	no	no	no	no	novel	1st	no phenotype	101.1	0.9671
	YPR171W	BSP1	no	no	no	no	no	yes	no	no	no	no	novel	1st	no phenotype	101.493	0.7984
	YER155C	BEM2	no	no	no	no	yes	no	no	no	no	no	novel	1st	no phenotype	102.2	0.4448
	YKL137W	CMC1	no	no	no	no	no	no	yes	no	no	no	novel	1st	no phenotype	102.9	0.7242
	YLR206W	ENT2	no	no	no	no	no	yes	no	no	no	no	novel	1st	no phenotype	105.1	0.5466
	YDR061W	YDR061W	yes	no	no	yes	yes	no	yes	no	no	no	novel	1st	no phenotype	105.9	0.4848
	YJL066C	MPM1	no	no	no	no	yes	no	yes	no	no	no	novel	1st	no phenotype	105.9	0.7037
	YGL226W	YGL226W	no	no	no	no	yes	no	yes	no	no	no	novel	1st	no phenotype	107.5	0.1832
	YMR115W	YMR115W	no	no	no	no	yes	no	yes	no	no	no	novel	1st	no phenotype	107.7	0.181
	YOR354C	MSC6	yes	no	yes	yes	yes	no	no	no	no	no	novel	1st	no phenotype	107.9	0.171
	YMR109W	MYO5	no	yes	no	yes	no	yes	no	no	no	no	novel	1st	no phenotype	108.4	0.2397
	YLR390W	ECM19	no	no	no	no	yes	no	no	no	no	no	novel	1st	no phenotype	108.8	0.1141
	YNL322C	KRE1	no	no	no	no	no	no	no	no	no	no	novel	1st	no phenotype	109.7	0.2973
	YER083C	GET2	no	no	no	no	no	no	no	no	no	no	novel	1st	no phenotype	110	0.2929
	YNL037C	IDH1	no	no	no	no	yes	no	no	no	no	no	novel	1st	no phenotype	110	0.1571
	YEL052W	AFG1	yes	yes	no	yes	yes	no	yes	no	no	no	novel	1st	no phenotype	111.3	0.6993
	YMR222C	FSH2	no	yes	no	yes	no	no	yes	no	no	no	novel	1st	no phenotype	112.4	0.0318
	YJL099W	CHS6	no	no	no	no	no	no	no	no	no	no	novel	1st	no phenotype	112.6	0.2065
	YPR109W	YPR109W	yes	no	no	yes	no	no	yes	no	no	no	novel	1st	no phenotype	112.8	0.1119
	YNL058C	YNL058C	no	no	no	no	no	no	yes	no	no	no	novel	1st	no phenotype	113.2	0.1469
	YER182W	YER182W	no	no	no	no	yes	no	yes	no	no	no	novel	1st	no phenotype	113.4	0.1141
	YMR027W	YMR027W	yes	no	no	yes	no	no	yes	no	no	no	novel	1st	no phenotype	113.4	0.2014
	YMR092C	AIP1	no	yes	no	yes	no	yes	no	no	no	no	novel	1st	no phenotype	114.4	0.3112
	YHR114W	BZZ1	no	no	no	no	no	yes	no	no	no	no	novel	1st	no phenotype	114.5	0.1578
	YCR009C	RVS161	no	yes	no	yes	no	yes	no	no	no	no	novel	1st	no phenotype	114.7	0.1603
	YBL061C	SKT5	no	no	no	no	no	no	no	no	no	no	novel	1st	no phenotype	115.3	0.0105
	YNL168C	YNL168C	no	no	no	no	yes	no	yes	no	no	no	novel	1st	no phenotype	115.5	0.0532
	YOR035C	SHE4	no	yes	no	yes	no	no	no	no	no	no	novel	1st	no phenotype	116.4	0.1946
	YLR077W	YLR077W	yes	no	no	yes	yes	no	yes	no	no	no	novel	1st	no phenotype	116.7	0.2637
	YNL106C	INP52	no	no	no	no	no	yes	no	no	no	no	novel	1st	no phenotype	116.9	0.0685
	YGL181W	GTS1	no	no	no	no	no	no	no	no	no	no	novel	1st	no phenotype	117	0.1105
	YBR151W	APD1	no	no	no	no	no	no	yes	no	no	yes	novel	1st	altered	119.6	0.002
	YDR388W	RVS167	no	yes	no	yes	no	yes	no	no	no	yes	novel	1st	altered	120.8	0.0176
	YBR227C	MCX1	no	no	no	no	yes	no	yes	no	no	yes	novel	1st	altered	122.3	0.0487
	YDL178W	DLD2	yes	no	yes	yes	yes	no	no	no	no	yes	novel	1st	altered	122.4	0.0051
	YML050W	AIM32	no	no	yes	yes	no	no	yes	no	no	yes	novel	1st	altered	122.7	0.0374
	YHR198C	AIM18	yes	no	no	yes	yes	no	yes	no	no	yes	novel	1st	altered	123.8	0.00046
	YPR004C	AIM45	yes	no	no	yes	yes	no	yes	no	no	yes	novel	1st	altered	125.4	0.0193
	YMR067C	UBX4	no	no	no	no	no	no	no	no	no	yes	novel	1st	altered	126	0.0012
	YPL099C	AIM43	no	no	yes	yes	yes	no	yes	no	no	yes	novel	1st	altered	126	0.0018
	YNL153C	GIM3	no	no	no	no	no	no	no	no	no	yes	novel	1st	altered	126.5	0.0025
	YIL157C	COA1	yes	yes	yes	yes	yes	no	yes	no	no	yes	novel	1st	altered	127.368	0.0119
	YKL037W	AIM26	no	no	no	no	no	no	yes	no	no	yes	novel	1st	altered	129.2	0.00099
	YIL034C	CAP2	no	yes	no	yes	no	yes	no	no	no	yes	novel	1st	altered	130.6	0.0072
	YLR330W	CHS5	no	no	no	no	no	no	no	no	no	yes	novel	1st	altered	131	0.0031
	YGL160W	AIM14	no	no	no	no	no	no	yes	no	no	yes	novel	1st	altered	132.5	0.0097
	YDR493W	AIM8	no	no	no	no	yes	no	yes	no	no	yes	novel	1st	altered	136.1	0.00075
	YJR133W	XPT1	no	no	yes	yes	no	no	no	no	no	yes	novel	1st	altered	136.6	0.003
	YJR100C	AIM25	yes	no	no	yes	yes	no	yes	no	no	yes	novel	1st	altered	138.5	0.0038
	YDR036C	EHD3	no	no	no	no	yes	no	no	no	no	yes	novel	1st	altered	139.4	0.0084
	YGR080W	TWF1	no	yes	no	yes	no	yes	no	no	no	yes	novel	1st	altered	141.4	5e-05
	YLR268W	SEC22	no	no	no	no	no	no	no	no	no	yes	novel	1st	altered	143.1	0.0062
	YPL158C	AIM44	no	no	no	no	no	no	yes	no	no	yes	novel	1st	altered	143.4	0.00075
	YHR117W	TOM71	no	no	no	no	yes	no	yes	no	no	yes	novel	1st	altered	144	0.002
	YLR059C	REX2	no	yes	no	yes	yes	no	no	no	no	yes	novel	1st	altered	144.8	0.00055
	YLR348C	DIC1	no	no	no	no	yes	no	no	no	no	yes	novel	1st	altered	145.9	9.1e-05
	YOL042W	NGL1	no	no	no	no	yes	no	yes	no	no	yes	novel	1st	altered	146.5	0.0062
	YMR157C	AIM36	yes	yes	yes	yes	yes	no	yes	no	no	yes	novel	1st	altered	146.814	0.0293
	YDL104C	QRI7	no	no	no	no	yes	no	yes	no	no	yes	novel	1st	altered	149.7	0.0164
	YKL129C	MYO3	no	yes	no	yes	no	yes	no	no	no	yes	novel	1st	altered	149.7	0.00055
	YBR111C	YSA1	no	no	no	no	yes	no	yes	no	no	yes	novel	1st	altered	149.8	0.00013
	YIL070C	MAM33	no	no	no	no	yes	no	no	no	no	yes	novel	1st	altered	153.8	4e-05
	YKR074W	AIM29	no	no	no	no	no	no	yes	no	no	yes	novel	1st	altered	155.1	0.00065
	YNL020C	ARK1	no	no	no	no	no	yes	no	no	no	yes	novel	1st	altered	156	0.00021
	YAL046C	AIM1	no	no	yes	yes	no	no	yes	no	no	yes	novel	1st	altered	157.6	0.0075
	YIL158W	AIM20	no	yes	no	yes	no	no	yes	no	no	yes	novel	1st	altered	157.7	0.00044
	YJR080C	AIM24	yes	yes	no	yes	yes	no	yes	no	no	yes	novel	1st	altered	158.818	0.00046
	YIR003W	AIM21	no	yes	no	yes	no	yes	yes	no	no	yes	novel	1st	altered	165.6	6.3e-05
	YDR316W	OMS1	no	yes	yes	yes	yes	no	yes	no	no	yes	novel	1st	altered	166.687	0.0027
	YOR286W	AIM42	no	no	yes	yes	yes	no	yes	no	no	yes	novel	1st	altered	193.64	0.00067
	YGL221C	NIF3	no	no	no	no	yes	no	yes	no	no	yes	novel	1st	altered	197.6	0.007
	YLR418C	CDC73	yes	no	no	yes	no	no	no	no	no	yes	novel	1st	altered	200.4	4.6e-05
	YLR168C	AIM30	no	no	yes	yes	yes	no	yes	no	no	yes	novel	1st	altered	206.3	0.00031
	YJL131C	AIM23	no	yes	no	yes	yes	no	yes	no	no	yes	novel	1st	altered	228.667	0.00067
	YBR163W	DEM1	no	no	no	no	yes	no	yes	no	no	yes	novel	1st	altered	334	0.002
	YDL237W	AIM6	no	no	no	no	no	no	yes	no	no	no	novel	2nd	respiratory deficient	0	N/A
	YHR011W	DIA4	no	no	no	no	yes	no	no	no	no	no	novel	2nd	respiratory deficient	0	N/A
	YIL087C	AIM19	no	no	no	no	yes	no	yes	no	no	no	novel	2nd	respiratory deficient	0	N/A
	YMR293C	AIM47	no	no	no	no	yes	no	no	no	no	no	novel	2nd	respiratory deficient	0	N/A
	YOL071W	EMI5	no	no	no	no	yes	no	no	no	no	no	novel	2nd	respiratory deficient	0	N/A
	YOR205C	AIM40	no	no	no	no	yes	no	yes	no	no	no	novel	2nd	respiratory deficient	0	N/A
	YGR167W	CLC1	no	no	no	no	no	no	no	no	no	no	novel	2nd	altered	20.7	0.00031
	YPL087W	YDC1	no	no	no	no	no	no	no	no	no	no	novel	2nd	altered	29.9	0.00015
	YFR007W	AIM12	no	no	no	no	no	no	yes	no	no	no	novel	2nd	altered	63.2	0.00048
	YML087C	AIM33	no	no	no	no	no	no	yes	no	no	no	novel	2nd	altered	67.3	4e-05
	YAL049C	AIM2	no	no	no	no	no	no	yes	no	no	no	novel	2nd	altered	71	0.0071
	YDR063W	AIM7	no	no	no	no	no	no	yes	no	no	no	novel	2nd	altered	73.1	0.0293
	YHL021C	AIM17	no	no	no	no	yes	no	yes	no	no	no	novel	2nd	altered	73.4	0.018
	YER048C	CAJ1	no	no	no	no	no	no	yes	no	no	no	novel	2nd	altered	79.1	0.012
	YGR031W	YGR031W	no	no	no	no	yes	no	yes	no	no	no	novel	2nd	no phenotype	84.5	0.1175
	YKL069W	YKL069W	no	no	no	no	no	no	yes	no	no	no	novel	2nd	no phenotype	85	0.4519
	YKL063C	YKL063C	no	no	no	no	no	no	yes	no	no	no	novel	2nd	no phenotype	88.1	0.345
	YDL110C	TMA17	no	no	no	no	no	no	yes	no	no	no	novel	2nd	no phenotype	89.7	0.2842
	YDL078C	MDH3	no	no	no	no	no	no	no	no	no	no	novel	2nd	no phenotype	89.8	0.4351
	YIL010W	DOT5	no	no	no	no	no	no	no	no	no	no	novel	2nd	no phenotype	90.2	0.3969
	YDL053C	PBP4	no	no	no	no	no	no	yes	no	no	no	novel	2nd	no phenotype	90.5	0.4646
	YDR031W	MIC14	no	no	no	no	yes	no	yes	no	no	no	novel	2nd	no phenotype	90.8	0.3268
	YOR228C	YOR228C	no	no	no	no	yes	no	yes	no	no	no	novel	2nd	no phenotype	92.2	0.4351
	YPR098C	YPR098C	no	no	no	no	yes	no	yes	no	no	no	novel	2nd	no phenotype	92.8	0.5799
	YGL080W	YGL080W	no	no	no	no	yes	no	yes	no	no	no	novel	2nd	no phenotype	93	0.6797
	YJR102C	VPS25	no	no	no	no	no	no	no	no	no	no	novel	2nd	no phenotype	94.2	0.4383
	YAL008W	FUN14	no	no	no	no	yes	no	yes	no	no	no	novel	2nd	no phenotype	94.8	0.4144
	YDR248C	YDR248C	no	no	no	no	no	no	yes	no	no	no	novel	2nd	no phenotype	95.1	0.685
	YOR280C	FSH3	no	no	no	no	no	no	yes	no	no	no	novel	2nd	no phenotype	95.1	0.618
	YKR049C	YKR049C	no	no	no	no	yes	no	yes	no	no	no	novel	2nd	no phenotype	95.9	0.9333
	YPL067C	YPL067C	no	no	no	no	no	no	yes	no	no	no	novel	2nd	no phenotype	96.4	0.5123
	YGR232W	NAS6	no	no	no	no	no	no	no	no	no	no	novel	2nd	no phenotype	96.7	0.8518
	YLR351C	NIT3	no	no	no	no	yes	no	yes	no	no	no	novel	2nd	no phenotype	96.9	0.7595
	YJR125C	ENT3	no	no	no	no	no	yes	no	no	no	no	novel	2nd	no phenotype	97.7	0.662
	YER163C	YER163C	no	no	no	no	no	no	yes	no	no	no	novel	2nd	no phenotype	100.5	0.9413
	YKL039W	PTM1	no	no	no	no	no	no	yes	no	no	no	novel	2nd	no phenotype	100.5	0.9002
	YLR283W	YLR283W	no	no	no	no	yes	no	yes	no	no	no	novel	2nd	no phenotype	100.6	0.5728
	YOR131C	YOR131C	no	no	no	no	no	no	yes	no	no	no	novel	2nd	no phenotype	102.4	0.7659
	YPL260W	YPL260W	no	no	no	no	no	no	yes	no	no	no	novel	2nd	no phenotype	103.3	0.9266
	YBR052C	RFS1	no	no	no	no	no	no	yes	no	no	no	novel	2nd	no phenotype	103.77	0.6503
	YMR071C	TVP18	no	no	no	no	no	no	no	no	no	no	novel	2nd	no phenotype	106.9	0.4461
	YPL107W	YPL107W	no	no	no	no	yes	no	yes	no	no	no	novel	2nd	no phenotype	107.5	0.5358
	YOR042W	CUE5	no	no	no	no	no	no	yes	no	no	no	novel	2nd	no phenotype	108.4	0.1072
	YBR269C	YBR269C	no	no	no	no	yes	no	yes	no	no	no	novel	2nd	no phenotype	108.564	0.2111
	YDL018C	ERP3	no	no	no	no	no	no	no	no	no	no	novel	2nd	no phenotype	110.8	0.1407
	YBR053C	YBR053C	no	no	no	no	no	no	yes	no	no	no	novel	2nd	no phenotype	114	0.0209
	YGL019W	CKB1	no	no	no	no	no	no	no	no	no	no	novel	2nd	no phenotype	114.1	0.2284
	YLR218C	YLR218C	no	no	no	no	no	no	yes	no	no	no	novel	2nd	no phenotype	114.4	0.2879
	YCR004C	YCP4	no	no	no	no	yes	no	yes	no	no	no	novel	2nd	no phenotype	114.6	0.3616
	YGR037C	ACB1	no	no	no	no	no	no	no	no	no	no	novel	2nd	altered	133.7	0.00019
	YHR199C	AIM46	no	no	no	no	yes	no	yes	no	no	no	novel	2nd	altered	136.3	1.2e-05
	YER093C-A	AIM11	no	no	no	no	no	no	yes	no	no	no	novel	2nd	altered	150.6	0.00093
Data first presented in this manuscript, "Analysis of Computational Functional Genomic Approaches for Directing Experimental Biology: a Case Study in Mitochondrial Biogenesis"	YBR294W	SUL1	no	no	no	no	no	no	no	no	no	no	random	1st	respiratory deficient	0	N/A
	YDR518W	EUG1	no	no	no	no	no	no	no	no	no	no	random	1st	respiratory deficient	0	N/A
	YGL223C	COG1	no	no	no	no	no	no	no	no	no	no	random	1st	respiratory deficient	0	N/A
	YMR039C	SUB1	no	no	no	no	no	no	no	no	no	no	random	1st	altered	23.3141	6.3e-05
	YBR197C	YBR197C	no	no	no	no	no	no	yes	no	no	no	random	1st	altered	33.8	1e-05
	YJR122W	CAF17	yes	yes	yes	yes	yes	no	yes	no	no	yes	random	1st	altered	46.0439	0.00077
	YDR225W	HTA1	no	no	no	no	no	no	no	no	no	no	random	1st	altered	66.9	0.0015
	YDR385W	EFT2	no	no	no	no	no	no	no	no	no	no	random	1st	altered	74.8653	0.00065
	YOR138C	RUP1	no	no	no	no	no	no	no	no	no	no	random	1st	no phenotype	80.6541	0.0028
	YJR148W	BAT2	no	no	no	no	no	no	no	no	no	no	random	1st	no phenotype	87.4255	0.2824
	YJL121C	RPE1	no	no	no	no	no	no	no	no	no	no	random	1st	no phenotype	93.4	0.2705
	YDR198C	YDR198C	no	no	no	no	no	no	no	no	no	no	random	1st	no phenotype	93.802	0.3011
	YML029W	USA1	no	no	no	no	no	no	no	no	no	no	random	1st	no phenotype	93.9884	0.332
	YDL144C	YDL144C	no	no	no	no	no	no	yes	no	no	no	random	1st	no phenotype	95.9521	0.7912
	YML002W	YML002W	no	no	no	no	no	no	yes	no	no	no	random	1st	no phenotype	96.8884	0.6429
	YMR058W	FET3	no	no	no	no	no	no	no	no	no	no	random	1st	no phenotype	96.9501	0.6216
	YMR156C	TPP1	no	no	no	no	no	no	no	no	no	no	random	1st	no phenotype	97.3188	0.8513
	YGL051W	MST27	no	no	no	no	no	no	no	no	no	no	random	1st	no phenotype	99.8467	0.8034
	YML055W	SPC2	no	no	no	no	no	no	no	no	no	no	random	1st	no phenotype	100.092	0.9121
	YPR002W	PDH1	no	no	no	no	yes	no	no	no	no	no	random	1st	no phenotype	102.299	0.7075
	YJR134C	SGM1	no	no	no	no	no	no	yes	no	no	no	random	1st	no phenotype	102.513	0.6642
	YPR013C	YPR013C	no	no	no	no	no	no	yes	no	no	no	random	1st	no phenotype	102.774	0.9178
	YDL038C	YDL038C	no	no	no	no	no	no	no	no	no	no	random	1st	no phenotype	103.527	0.8531
	YKL130C	SHE2	no	no	no	no	no	no	no	no	no	no	random	1st	no phenotype	103.7	0.7656
	YER067W	YER067W	no	no	no	no	no	no	yes	no	no	no	random	1st	no phenotype	103.797	0.9612
	YMR114C	YMR114C	no	no	no	no	no	no	yes	no	no	no	random	1st	no phenotype	104.872	0.4421
	YPR027C	YPR027C	no	no	no	no	no	no	yes	no	no	no	random	1st	no phenotype	106.4	0.3367
	YFL011W	HXT10	no	no	no	no	yes	no	no	no	no	no	random	1st	no phenotype	106.503	0.6433
	YGL092W	NUP145	no	no	no	no	no	no	no	no	no	no	random	1st	no phenotype	107.493	0.3282
	YKL221W	MCH2	no	no	no	no	no	no	no	no	no	no	random	1st	no phenotype	107.683	0.281
	YER044C	ERG28	no	no	no	no	no	no	no	no	no	no	random	1st	no phenotype	108.3	0.5866
	YJR066W	TOR1	no	no	no	no	no	no	no	no	no	no	random	1st	no phenotype	109.248	0.1419
	YPL147W	PXA1	no	no	no	no	no	no	no	no	no	no	random	1st	no phenotype	109.905	0.1042
	YGR059W	SPR3	no	no	no	no	no	no	no	no	no	no	random	1st	no phenotype	109.994	0.2235
	YPR138C	MEP3	no	no	no	no	no	no	no	no	no	no	random	1st	no phenotype	110.12	0.1605
	YJL066C	MPM1	no	no	no	no	yes	no	yes	no	no	no	random	1st	no phenotype	111.503	0.1025
	YDR018C	YDR018C	no	no	no	no	no	no	no	no	no	no	random	1st	no phenotype	112.401	0.0446
	YBR007C	DSF2	no	no	no	no	no	no	yes	no	no	no	random	1st	no phenotype	112.412	0.0576
	YPR121W	THI22	no	no	no	no	no	no	no	no	no	no	random	1st	no phenotype	112.791	0.1711
	YDR446W	ECM11	no	no	no	no	no	no	no	no	no	no	random	1st	no phenotype	113.242	0.0289
	YKL068W	NUP100	no	no	no	no	no	no	no	no	no	no	random	1st	no phenotype	114.8	0.0249
	YOL100W	PKH2	no	no	no	no	no	no	no	no	no	no	random	1st	no phenotype	116.904	0.0879
	YHR092C	HXT4	no	no	no	no	no	no	no	no	no	no	random	1st	no phenotype	117.262	0.1727
	YML111W	BUL2	no	no	no	no	no	no	no	no	no	no	random	1st	no phenotype	118.721	0.0426
	YHR129C	ARP1	no	no	no	no	no	yes	no	no	no	no	random	1st	altered	133.688	0.0019
	YHR076W	PTC7	no	no	no	no	yes	no	yes	no	no	no	random	1st	altered	146.006	0.00032
	YIR043C	YIR043C	no	no	no	no	no	no	yes	no	no	no	random	1st	altered	148.34	0.00031
	YBR111C	YSA1	no	no	no	no	yes	no	yes	no	no	yes	random	1st	altered	162.95	0.0011
